# Supplementary material
Source: PubMed Central journal article supplement (PMC10657471)

Figure 1E

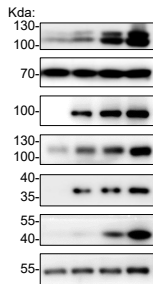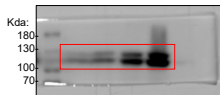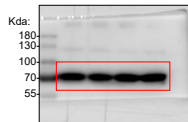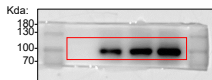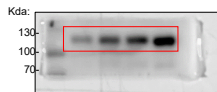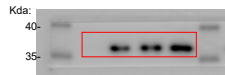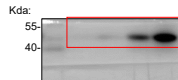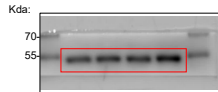

Figure 1H

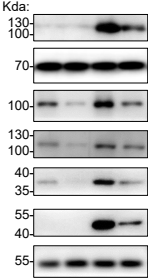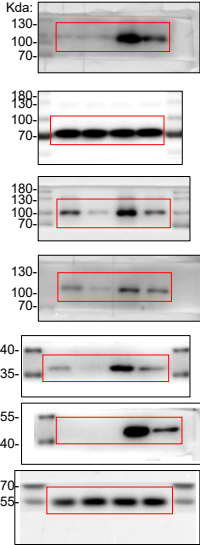

Figure 1K

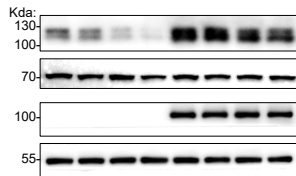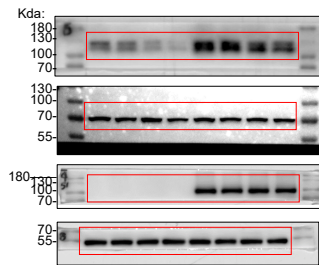

REP1

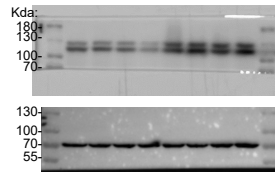

REP2

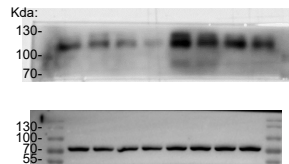

REP3

Figure 1L

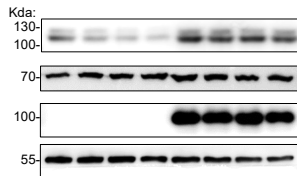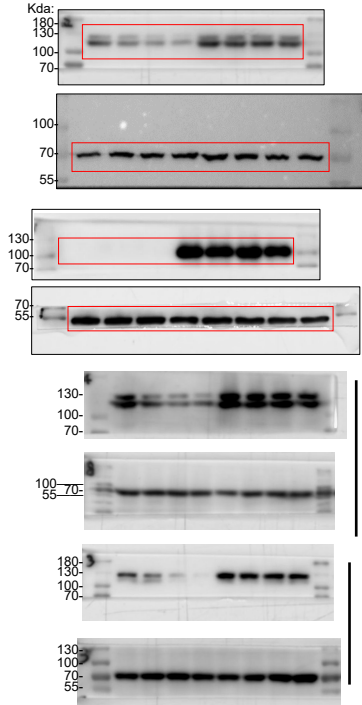

REP1

REP2

REP3

Figure 1M

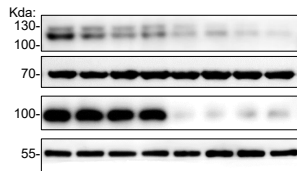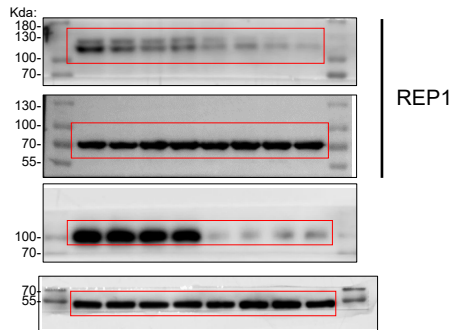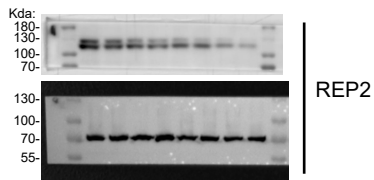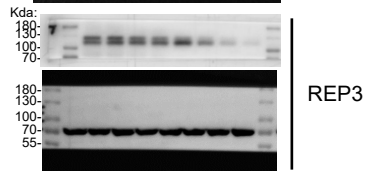

Figure 1N

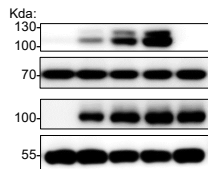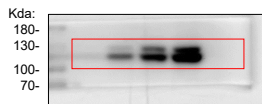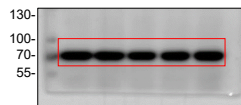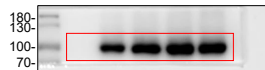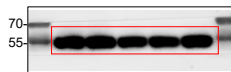

Figure 1O

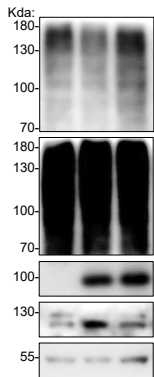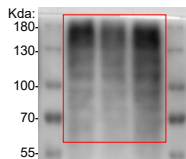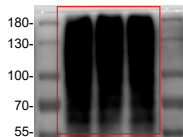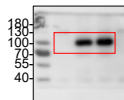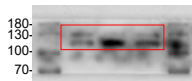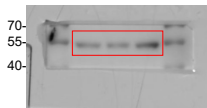

Figure 1P

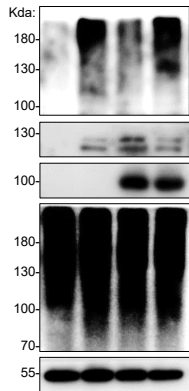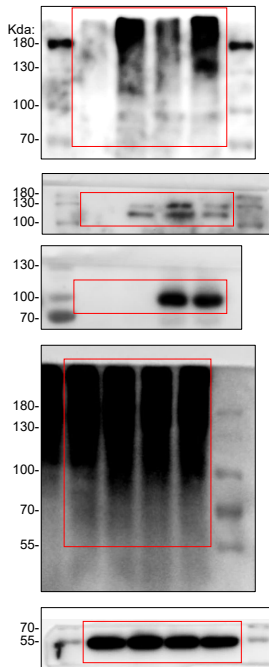



Figure 1Q

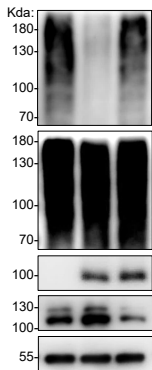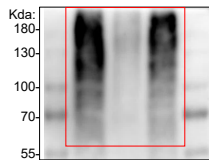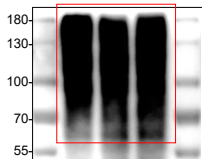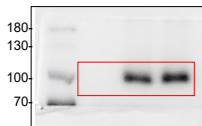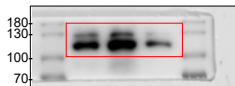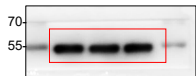

# Supplementary Figure 1A

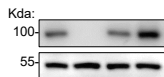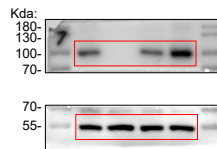

# Supplementary Figure 1B

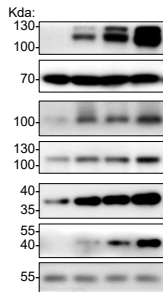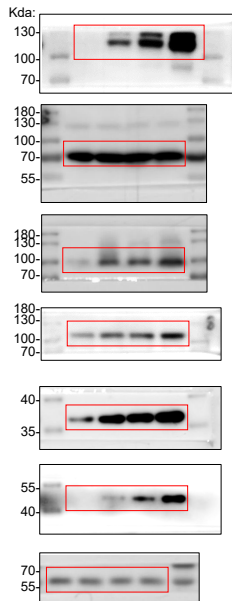

# Supplementary Figure 1E

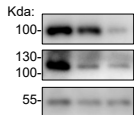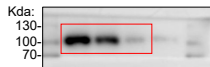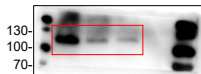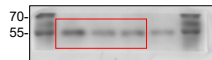

# Supplementary Figure 1F

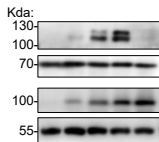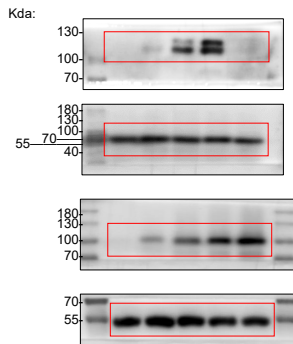

# Supplementary Figure 1G

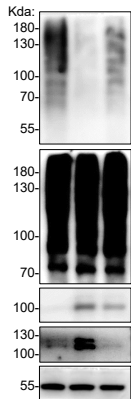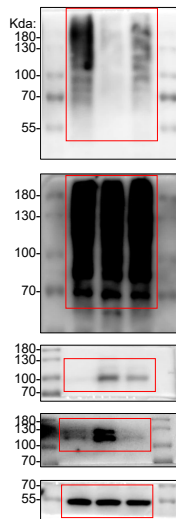

# Supplementary Figure 1H

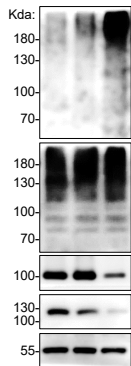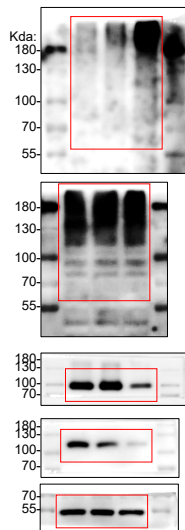

Figure 2A

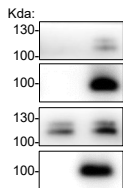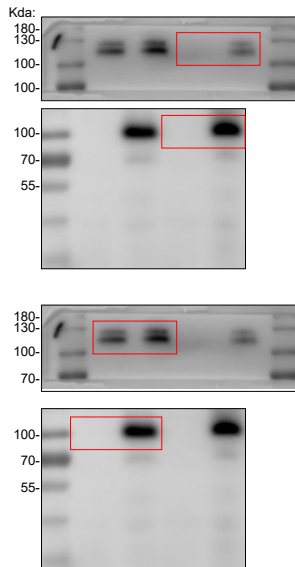



Figure 2B

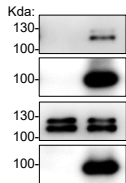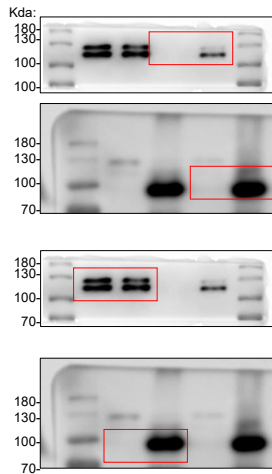

Figure 2C

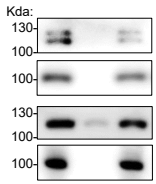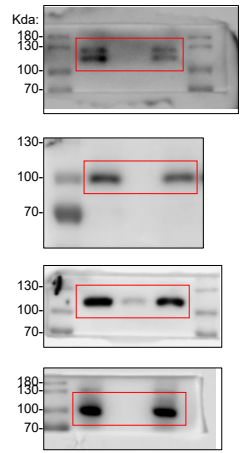

Figure 2E

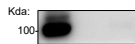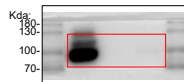

Figure 2G

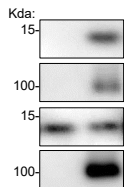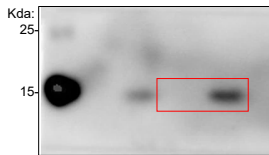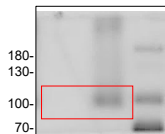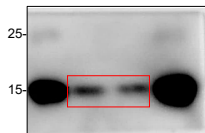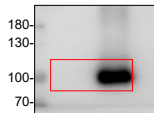

Figure 2H

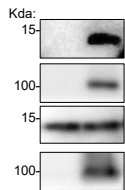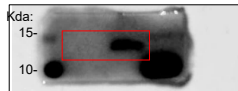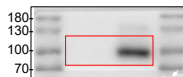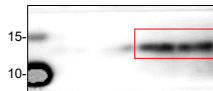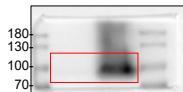

Figure 2I

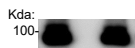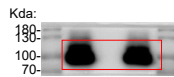

Figure 2K

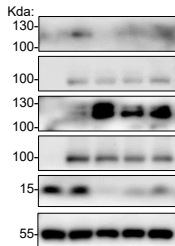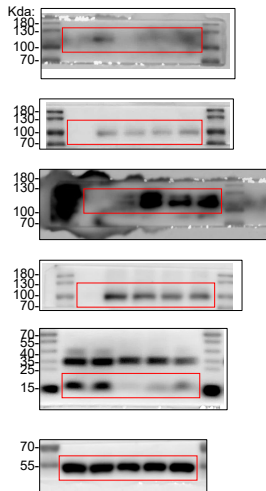

Figure 2L

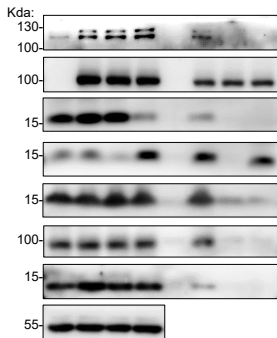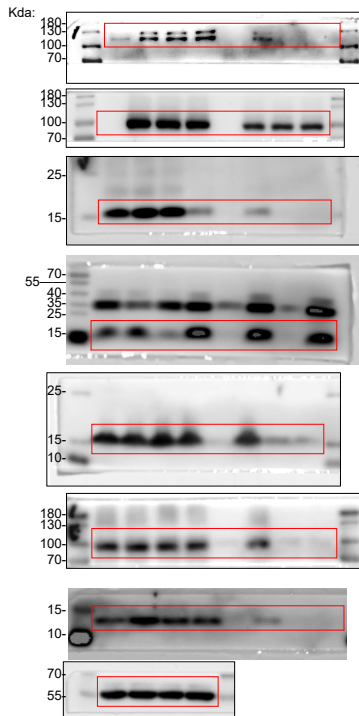



Figure 2N

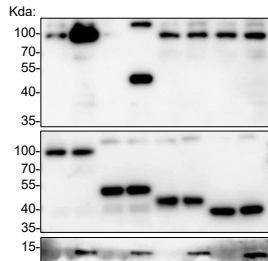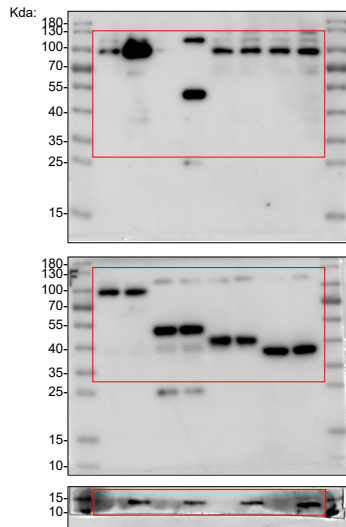

Figure 20

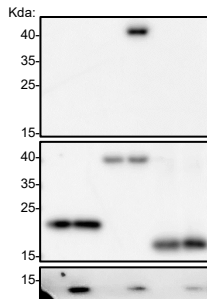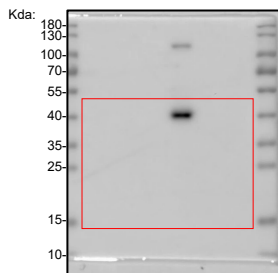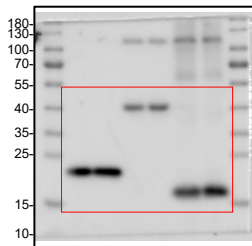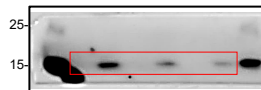

Figure 3A

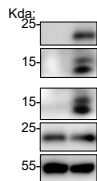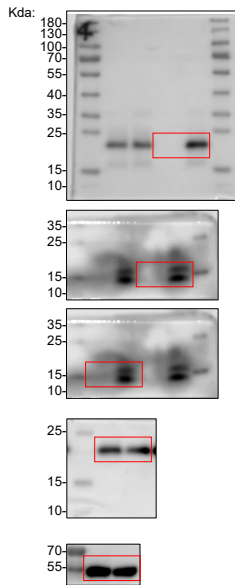

Figure 3B

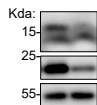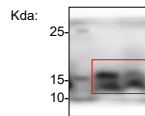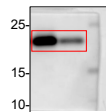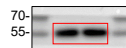

Figure 3C

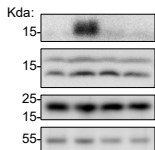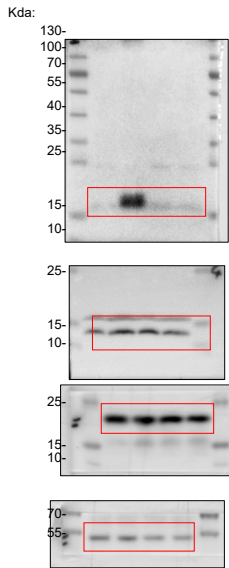

Figure 3D

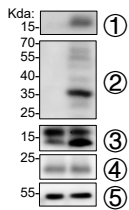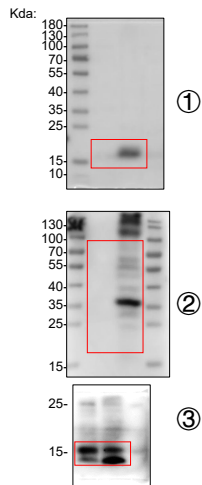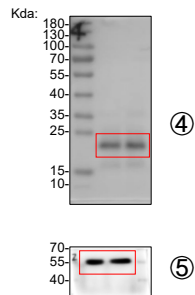

Figure 3E

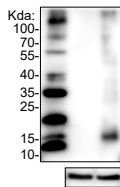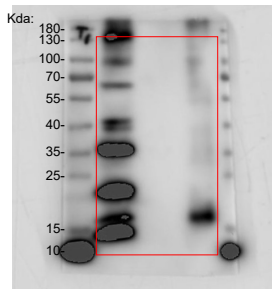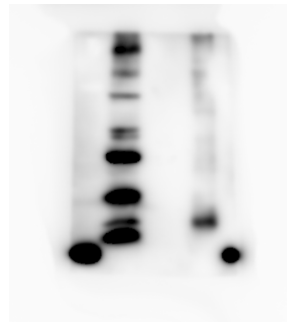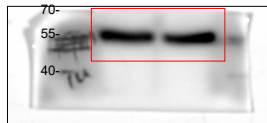

Figure 3F

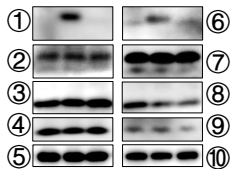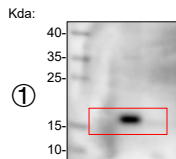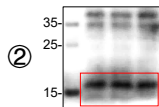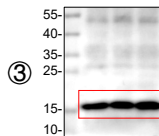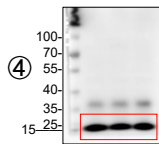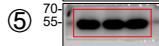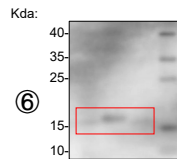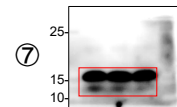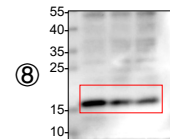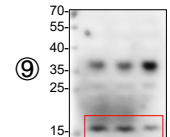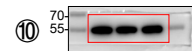



Figure 3I

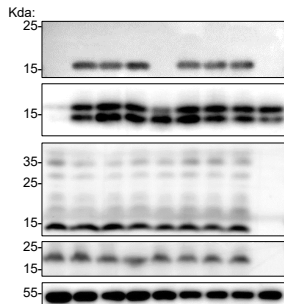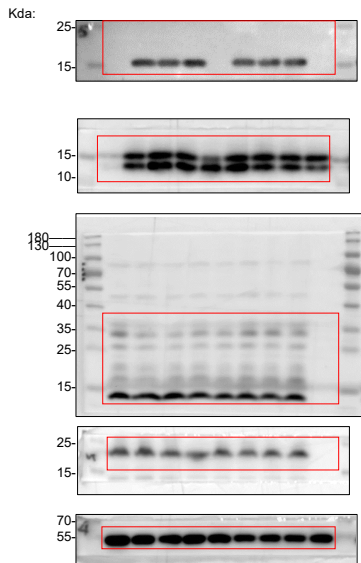

Figure 3J

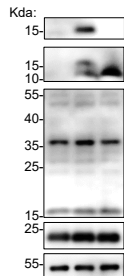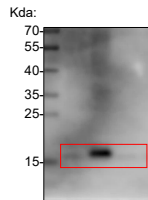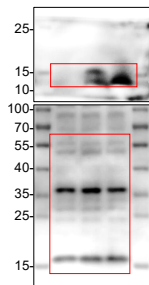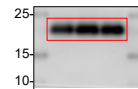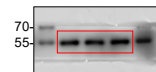

Figure 3L

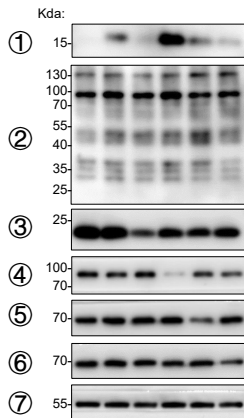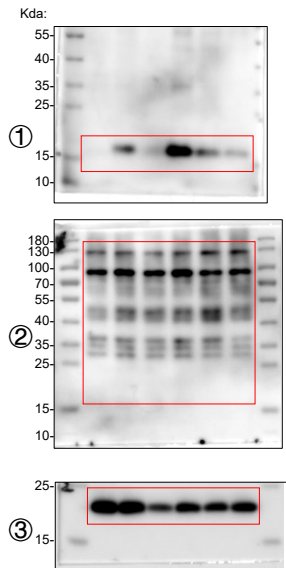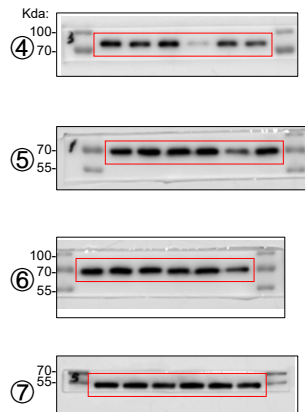

Figure 3M

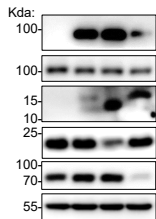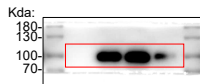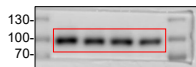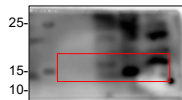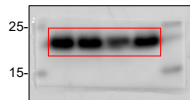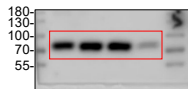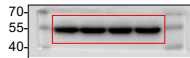

Figure 3N

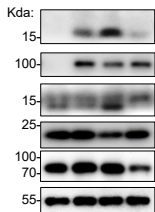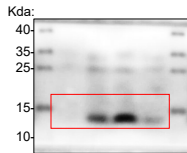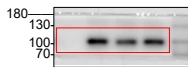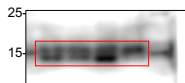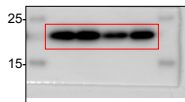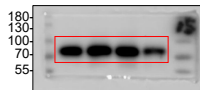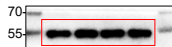

Figure 30

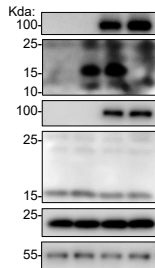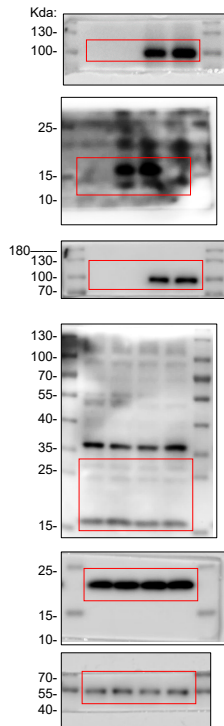

Figure 3P

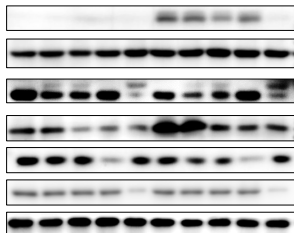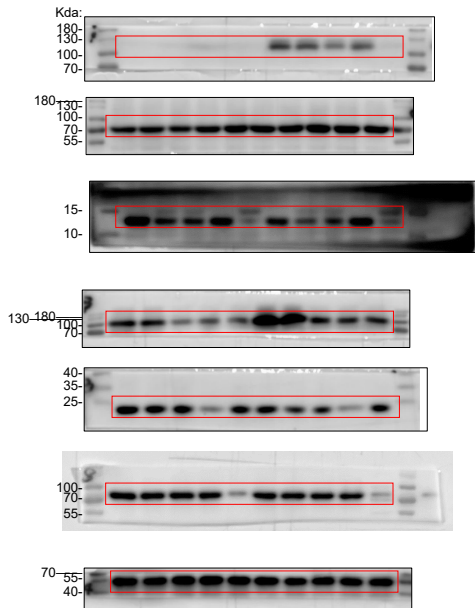

Figure 3Q

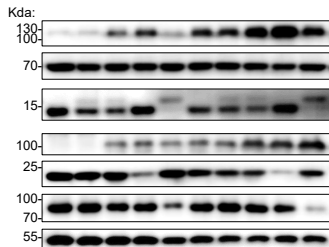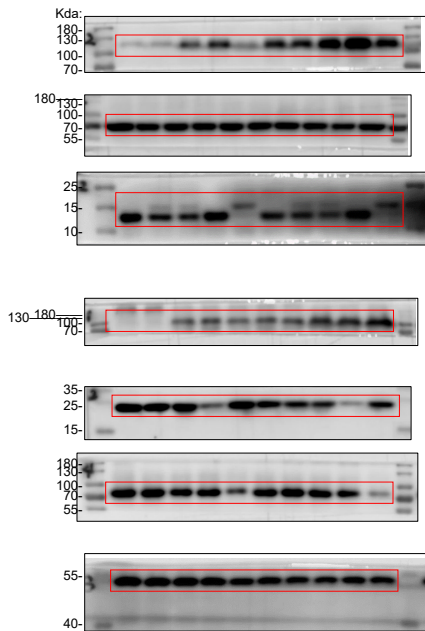



## Supplementary Figure 3A

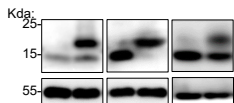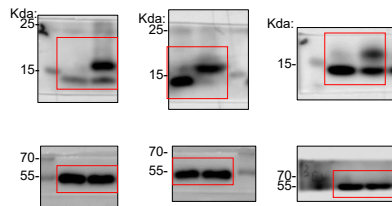

## Supplementary Figure 3C

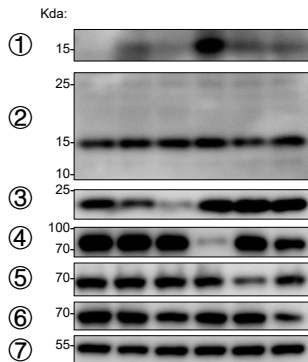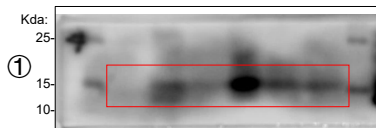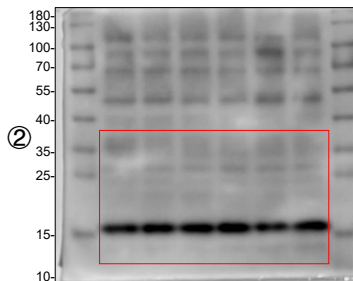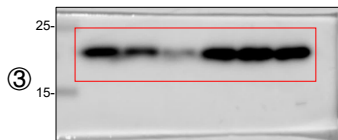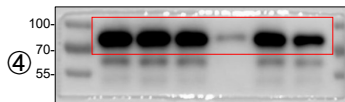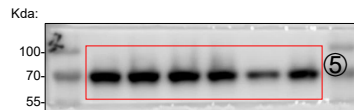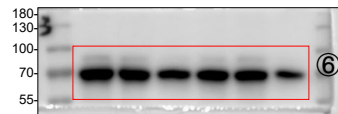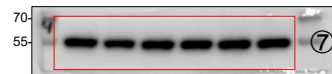

# Supplementary Figure 3D

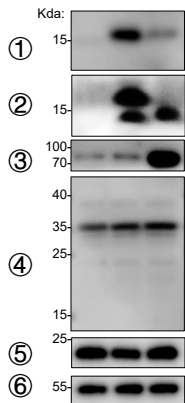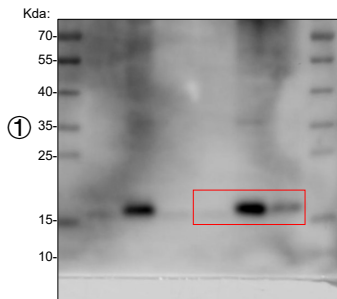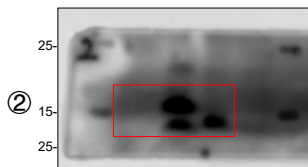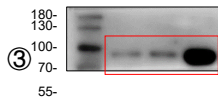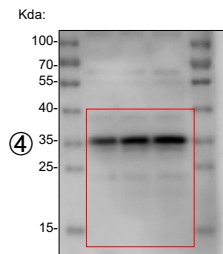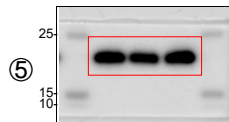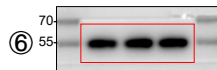

# Supplementary Figure 3E

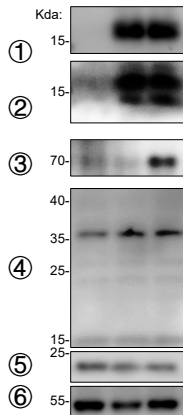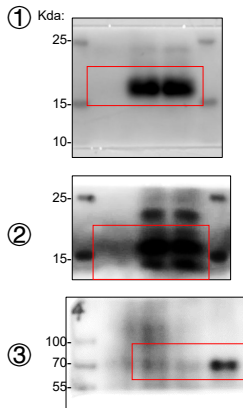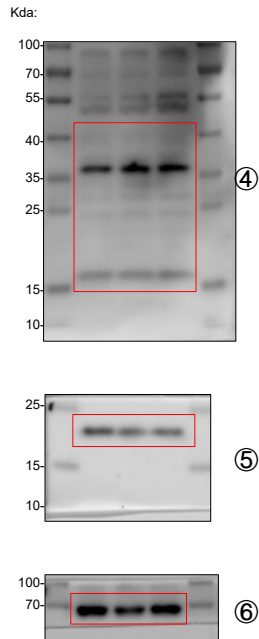

# Supplementary Figure 3F

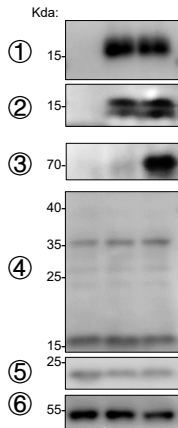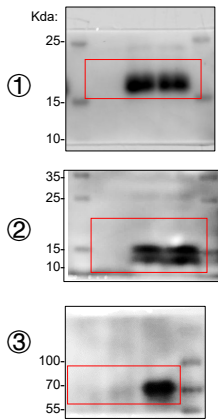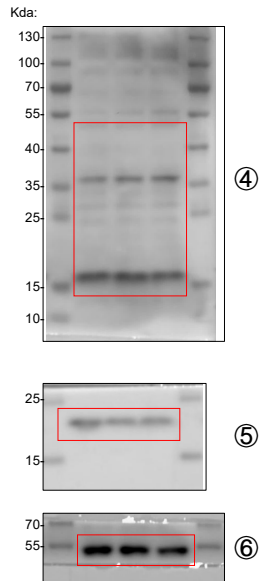

## Supplementary Figure 3G

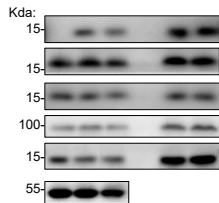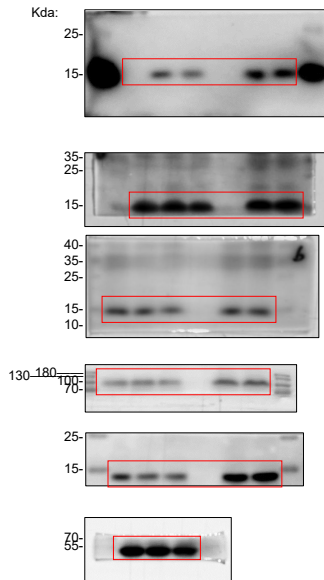

Figure 4A

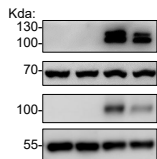

Kda:

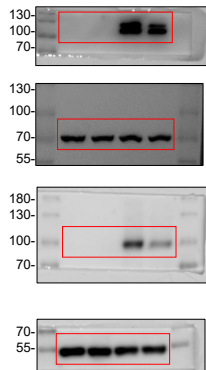

Figure 4C

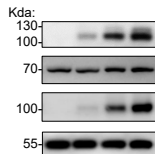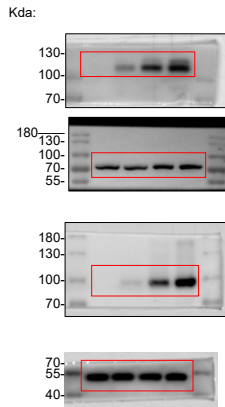



Figure 4E

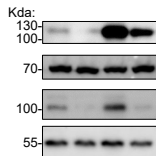

Kda:

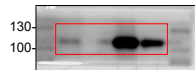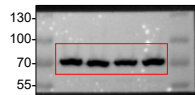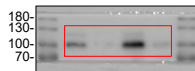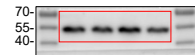

# Figure 4G

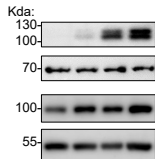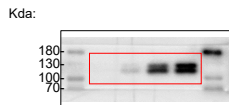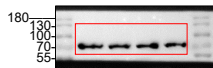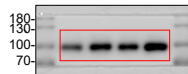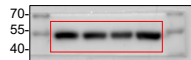

Figure 4I

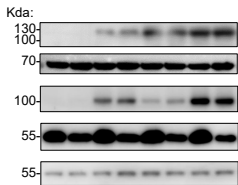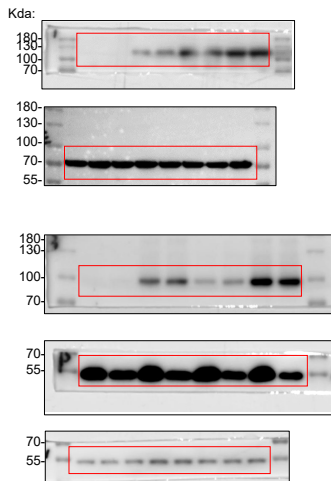

# Figure 4J

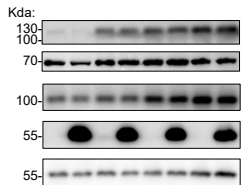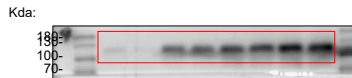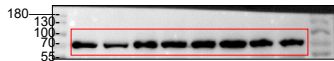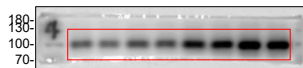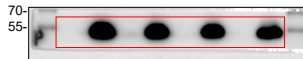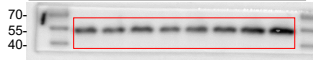

# Supplementary Figure 4A

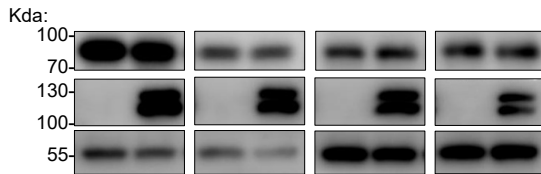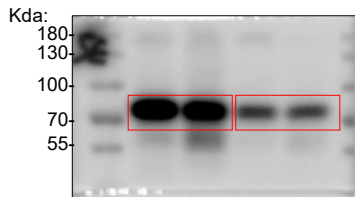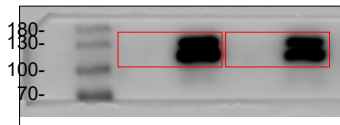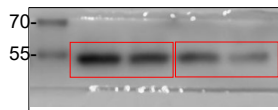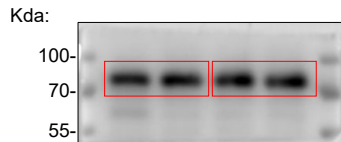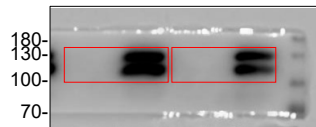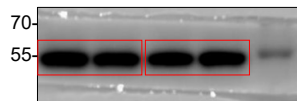

## Supplementary Figure 4B

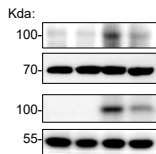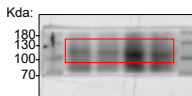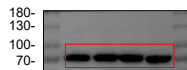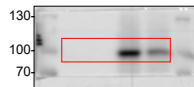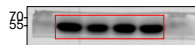

# Supplementary Figure 4D

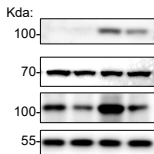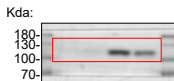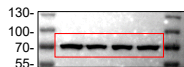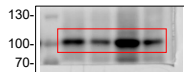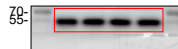

# Supplementary Figure 4H

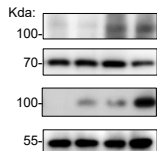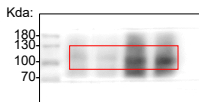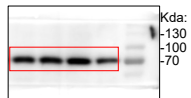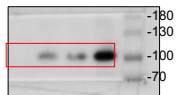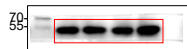



## Supplementary Figure 4I

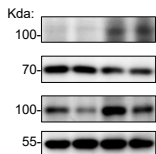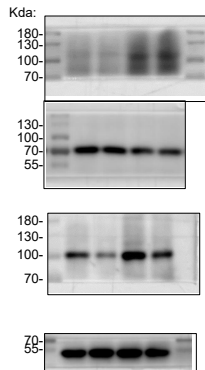

## Supplementary Figure 4J

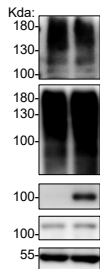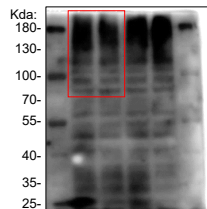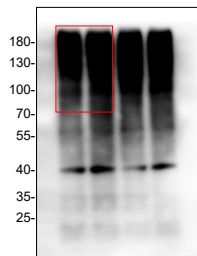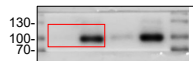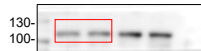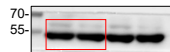

## Supplementary Figure 4K

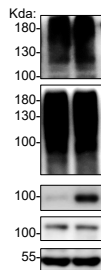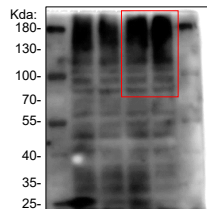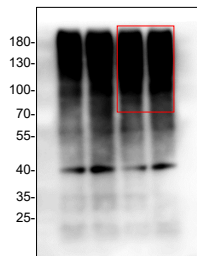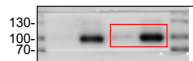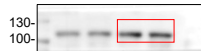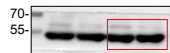

Figure 5H

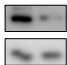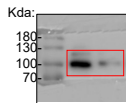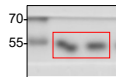

Figure 5I

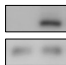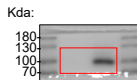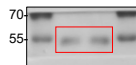

## Supplementary Figure 5G

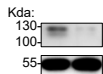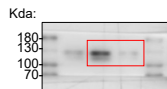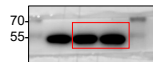

Supplement: 41418_2023_1228_MOESM5_ESM.pdf [file 41418_2023_1228_MOESM5_ESM.pdf]
