# Supplementary material
Source: PubMed Central journal article supplement (PMC10657471)
Supplement: 41418_2023_1228_MOESM2_ESM.pdf [file 41418_2023_1228_MOESM2_ESM.pdf]

## Supplementary Data 1. Genes upregulated in both HCT116 and SW480

| Gene Symbol | log2 (HCT116E / HCT116C) | log2 (SW480E / SW480C) |
|-------------|--------------------------|------------------------|
| USP51       | 13.18225971              | 5.68278915             |
| CNTNAP2     | 1.068810393              | 3.364051952            |
| PLXNA2      | 1.086905918              | 2.188828859            |
| SSTR5       | 0.595125645              | 1.924274889            |
| CACNA1H     | 0.3738752                | 1.771921748            |
| EML1        | 0.608872236              | 1.501028272            |
| SOX8        | 0.842401678              | 1.462861239            |
| ERFE        | 0.431354596              | 1.13893619             |
| FLNC        | 0.273442906              | 1.100285706            |
| INHBB       | 1.371051257              | 1.043349183            |
| ZFYVE28     | 0.555323117              | 0.964372905            |
| GRIK4       | 1.748211268              | 0.93313869             |
| SEMA3F      | 0.325497061              | 0.862402244            |
| PRRT4       | 0.469022746              | 0.839641789            |
| SEMA3A      | 0.562747987              | 0.808945514            |
| MCF2L       | 0.403796372              | 0.782040692            |
| OLFM1       | 1.11616248               | 0.776698393            |
| UNC5A       | 0.412463247              | 0.757829238            |
| SYT7        | 0.31277814               | 0.751205952            |
| PDE9A       | 0.338176958              | 0.744428501            |
| CDKN1C      | 0.736830176              | 0.739795576            |
| PRDM16      | 0.46908857               | 0.736808169            |
| ATP1A3      | 0.374153849              | 0.726524976            |
| USH1C       | 0.505936212              | 0.716803836            |
| AHNAK2      | 0.68958024               | 0.620041219            |
| FHL1        | 0.744456928              | 0.596702246            |
| BDNF        | 0.494704088              | 0.583354783            |
| KCNIP3      | 0.749485149              | 0.574213773            |
| ASS1        | 0.188907843              | 0.561398111            |
| VEGFA       | 0.248419764              | 0.545520409            |
| COL6A1      | 0.30375275               | 0.534192322            |
| GSE1        | 0.330639326              | 0.528733436            |
| PCSK9       | 0.169979821              | 0.489203809            |
| BMP6        | 0.644426449              | 0.475584804            |
| METTL7B     | 0.370142045              | 0.453185452            |
| CARD10      | 0.279713866              | 0.446533715            |
| PDK1        | 0.712422825              | 0.436320221            |
| PTPRU       | 0.31916701               | 0.423657379            |
| FGFR4       | 0.184205692              | 0.39835                |
| STMN3       | 0.270834124              | 0.389870957            |
| PDK3        | 0.583875827              | 0.385160376            |
| MCT4        | 0.154736903              | 0.370877922            |
| EPHB2       | 0.464117344              | 0.366694074            |
| KIF21B      | 0.554775738              | 0.356544511            |
| TMC6        | 0.3951285                | 0.351558467            |
| PGK1        | 0.441579596              | 0.347149453            |
| SULF2       | 0.719423331              | 0.342447687            |
| ASIC1       | 0.333715269              | 0.334264765            |
| MAN1A1      | 0.378072388              | 0.324276632            |
| HK2         | 0.474345446              | 0.320326339            |
| TBKBP1      | 0.399587292              | 0.311948869            |
| SPTBN2      | 0.338588813              | 0.308921746            |
| SYN3        | 0.171137286              | 0.306915381            |
| PTPRN2      | 0.560729698              | 0.298073625            |
| HSPA12A     | 0.247143883              | 0.279626086            |
| OBSCN       | 0.54668852               | 0.260010652            |
| GPR153      | 0.614678585              | 0.253839657            |
| RUNX3       | 0.258069394              | 0.252140205            |
| NARF        | 0.369767281              | 0.250287937            |
| ACSS2       | 0.299682627              | 0.24036857             |
| GOLGA8A     | 0.344338931              | 0.235694708            |
| MAP1LC3B    | 0.216899894              | 0.225585594            |
| LDHA        | 0.314525305              | 0.2181131              |
| GLO1        | 0.161647379              | 0.21106834             |
| CRABP2      | 0.530399128              | 0.209241977            |
| CLIP2       | 0.310106305              | 0.206752259            |
| STRA6       | 1.364928931              | 0.194767802            |
| COL18A1     | 0.427009345              | 0.17507006             |
