# Supplementary material
Source: PubMed Central journal article supplement (PMC10657471)
Supplement: 41418_2023_1228_MOESM3_ESM.pdf [file 41418_2023_1228_MOESM3_ESM.pdf]

Supplementary Data 2. Target sequences for shRNAs

| Gene  | Target sequences for shRNAs                                                          |
|-------|--------------------------------------------------------------------------------------|
| USP51 | CCCAGAGACTAGGAAACGTAA                                                                |
| ELOC  | 1#: CGAAACCAATGAGGTCAATTT<br>2#: TCAGTTTGCTGAGAACGAAAC<br>3#: CGTACAAGGTTTCGCTACACTA |
| VHL   | TATCACACTGCCAGTGTATAC                                                                |
| UBC9  | AGCAGAGGCCTACACGATTTA                                                                |
| SEN1  | TGACCATTACACGCAAAGATA                                                                |
| SEN2  | ACAATGCTGCCAGCTTATTTG                                                                |
| SEN3  | CTGCCTGCCAGATCTTCAAAC                                                                |
| TP53  | CGGCGCACAGAGGAAGAGAAT                                                                |
| HIF1A | CCGCTGGAGACACAATCATAT                                                                |
| HIF2A | CGACCTGAAGATTGAAGTGAT                                                                |
