# Supplementary material
Source: PubMed Central journal article supplement (PMC10657471)
Supplement: 41418_2023_1228_MOESM4_ESM.pdf [file 41418_2023_1228_MOESM4_ESM.pdf]

### Supplementary Data 3. Primary and secondary antibody for WB, IP, IHC, FC, CHIP and IF

| Antibody      | Information                                  | Application |
|---------------|----------------------------------------------|-------------|
| USP51         | orb338790, Biorbyt, Cambridge, UK            | WB          |
| USP51         | DF9994, Affbiotech, Liyang, China            | WB          |
| USP51         | NBP1-86167, Novus Biologicals, CO, USA       | IF, IHC     |
| HIF1A         | 66730-1-Ig, Proteintech, NJ, USA             | IF          |
| HIF1A         | ab179483, Abcam, Cambridge, UK               | WB          |
| HIF1A         | ab1, Abcam, Cambridge, UK                    | IP          |
| HIF1A         | ab51608, Abcam, Cambridge, UK                | IHC         |
| HIF2A         | ab8365, Abcam, Cambridge, UK                 | WB          |
| HIF2A         | ab207607, Abcam, Cambridge, UK               | IP          |
| HK2           | 22029-1-AP, Proteintech, NJ, USA             | WB          |
| LDHA          | 21799-1-AP, Proteintech, NJ, USA             | WB          |
| Alpha Tubulin | 11224-1-AP, Proteintech, NJ, USA             | WB          |
| ubiquitin     | Ab134953, Abcam, Cambridge, UK               | WB          |
| ubiquitin     | 10201-2-AP, Proteintech, NJ, USA             | WB          |
| ubiquitin     | ab303664, Abcam, Cambridge, UK               | WB          |
| VEGFA         | 19003-1-AP, Proteintech, NJ, USA             | WB          |
| CUL2          | 10981-2-AP, Proteintech, NJ, USA             | WB          |
| ELOB          | 10779-1-AP, Proteintech, NJ, USA             | WB          |
| ELOC          | 68164-1-Ig, Proteintech, NJ, USA             | WB          |
| ELOC          | 12450-1-AP, Proteintech, NJ, USA             | WB, IF      |
| RBX1          | 14895-1-AP, Proteintech, NJ, USA             | WB          |
| VHL           | 24756-1-AP, Proteintech, NJ, USA             | WB          |
| Ki67          | 27309-1-AP, Proteintech, NJ, USA             | IHC         |
| SENP1         | ab108981, Abcam, Cambridge, UK               | WB          |
| SENP2         | ab124724, Abcam, Cambridge, UK               | WB          |
| SENP3         | ab124790, Abcam, Cambridge, UK               | WB          |
| CD31          | ab134168, Abcam, Cambridge, UK               | IHC         |
| SUMO1         | sc-5308, Santa Cruz Biotechnology, CA, USA   | WB, IP, IF  |
| SUMO2/3/4     | sc-393144, Santa Cruz Biotechnology, CA, USA | WB, IP      |

| Antibody                               | Information                             | Application             |
|----------------------------------------|-----------------------------------------|-------------------------|
| UBC9                                   | ab75854, Abcam, Cambridge, UK           | WB                      |
| P53                                    | 10442-1-AP, Proteintech, NJ, USA        | WB                      |
| CD44                                   | 60224-1-Ig, Proteintech, NJ, USA        | FC                      |
| CD133                                  | 18470-1-AP, Proteintech, NJ, USA        | FC                      |
| Myc tag                                | ab32, Abcam, Cambridge, UK              | IP                      |
| Myc tag                                | ab9106, Abcam, Cambridge, UK            | WB, IF                  |
| Flag tag                               | 20543-1-AP, Proteintech, NJ, USA        | WB                      |
| Flag tag                               | F1804, Sigma-Aldrich, MA, USA           | IP                      |
| Flag tag                               | 66008-4-Ig, Proteintech, NJ, USA        | IF                      |
| GFP tag                                | ab290, Abcam, Cambridge, UK             | WB                      |
| GFP tag                                | ab291, Abcam, Cambridge, UK             | IP                      |
| HA tag                                 | ab1424, Abcam, Cambridge, UK            | IP                      |
| HA tag                                 | ab9110, Abcam, Cambridge, UK            | WB                      |
| HIF1A                                  | NB100-105, Novus Biologicals, CO, USA   | CHIP                    |
| HIF2A                                  | NB100-122, Novus Biologicals, CO, USA   | CHIP                    |
| Fluorescein-conjugated Goat Anti-Mouse | SA00003-1, Proteintech, NJ, USA         | Secondary antibody, FC  |
| PE-Cy7-conjugated Goat Anti-Rabbit     | K0034G-PE-Cy7, Solarbio, Beijing, China | Secondary antibody, FC  |
| Goat anti-rabbit IgG-HRP               | ab205718, Abcam, Cambridge, UK          | Secondary antibody, IHC |
| goat anti-mouse IgG-HRP                | abs20001, Absin, Shanghai, China        | Secondary antibody, WB  |
| Goat anti-rabbit IgG-HRP               | abs20147, Absin, Shanghai, China        | Secondary antibody, WB  |
| Cy3-conjugated Goat Anti-Rabbit IgG    | SA00009-2, Proteintech, NJ, USA         | Secondary antibody, IF  |
| FITC-conjugated Goat Anti-Mouse IgG    | SA00003-1, Proteintech, NJ, USA         | Secondary antibody, IF  |
| FITC-conjugated Goat Anti-Rabbit IgG   | SA00003-2, Proteintech, NJ, USA         | Secondary antibody, IF  |
| Cy3-conjugated Goat Anti-Mouse IgG     | SA00009-1, Proteintech, NJ, USA         | Secondary antibody, IF  |
