# Supplementary material
Source: PubMed Central journal article supplement (PMC10657471)
Supplement: 41418_2023_1228_MOESM6_ESM.pdf [file 41418_2023_1228_MOESM6_ESM.pdf]

## Supplementary Data 5. Primers for qRT-PCR

|    |                |                           |
|----|----------------|---------------------------|
| 1  | USP51-Forward  | GGCCCAAGGATACAGGGAAAGAA   |
| 2  | USP51-Reverse  | GCTTTAGGACAGAAAGGATGGAAAC |
| 3  | HIF1A-Forward  | GTCTGAGGGGACAGGAGGAT      |
| 4  | HIF1A-Reverse  | CTCCTCAGGTGGCTTGTCAG      |
| 5  | HK2-Forward    | GTGAATCGGAGAGGTCCCAC      |
| 6  | HK2-Reverse    | GCTAACTTCGGCCACAGGAT      |
| 7  | LDHA-Forward   | ACGTGCATTCCCGATTCCCT      |
| 8  | LDHA-Reverse   | GGAAAAGGCTGCCATGTTGG      |
| 9  | VEGFA-Forward  | GCAGAATCATCACGAAGTGG      |
| 10 | VEGFA-Reverse  | GCATGGTGATGTTGGACTCC      |
| 11 | Tublin-Forward | ACCTGATGTATGCCAAGCGT      |
| 12 | Tublin-Reverse | AGCTGAAATTCTGGGAGCATGA    |
