# Supplementary material
Source: PubMed Central journal article supplement (PMC10657471)
Supplement: 41418_2023_1228_MOESM7_ESM.pdf [file 41418_2023_1228_MOESM7_ESM.pdf]

## Supplementary Data 6. Primers for CHIP assay

| HRE   | Site                                  | Primer                                                           |
|-------|---------------------------------------|------------------------------------------------------------------|
| 1     | -1842 -1836<br>...T <b>CACGCT</b> ... | Forward: AGGCCTAAACCATGCAGACC<br>Reverse: AGGAAAACCTCAGGACAGCG   |
| 2     | -1755 -1749<br>...G <b>CGTGT</b> ...  | Forward: CGATAGCGTGTGGGCTGATT<br>Reverse: AGGTGGGATTGTTACAGTGCT  |
| 3     | -1516 -1511<br>...G <b>GTGCT</b> ...  | Forward: TGCCAGTTTTGTTGGCTG<br>Reverse: TGAGAATGCCAGCCCTACCT     |
| 4     | -1218 -1212<br>...G <b>CACGT</b> ...  | Forward: TGTGGCTGAGAAAATGCCCT<br>Reverse: CACATACTAGCACCCGGAGG   |
| 5     | -457 -452<br>...T <b>GTGCC</b> ...    | Forward: TAAAGCTCGCCAAAAAGGTCT<br>Reverse: AGGAAGCATAAGCAAGGGCT  |
| 6     | -265/-259<br>... <b>CCACGCC</b> ...   | Forward: AGAGGGTTGCCATCTCTGGA<br>Reverse: CCCCTGAAATGGAGGCTCAG   |
| 7     | -64/-58<br>...G <b>CACGTC</b> ...     | Forward: GACAGCGGTGCCATTCATCA<br>Reverse: CTCCTCAGGGCTGGTCACAA   |
| MAFF  | -                                     | Forward: AGAGCGGAGGGGAGACTG<br>Reverse: GTTCTCACCCGCTTCTG        |
| DMT1A | -                                     | Forward: TTCAGTGTGGCACGTACTGAG<br>Reverse: GGAGGAATTGTATTCTGCCAC |
