# Supplementary material
Source: PubMed Central journal article supplement (PMC10657471)
Supplement: 41418_2023_1228_MOESM8_ESM.pdf [file 41418_2023_1228_MOESM8_ESM.pdf]

Supplementary Data 7. Promoter sequences for luciferase reporter assay

| Promoters | Sequences                                                                                                                                                                               |
|-----------|-----------------------------------------------------------------------------------------------------------------------------------------------------------------------------------------|
| HRE1      | AGGCCTAAACCATGCAGACCCATTTCATTTTCATTTTGACAGTAGTGA<br>CCCAT <b>CACGCT</b> GCCTGAGGTTTTCCT                                                                                                 |
| HRE1 mut  | AGGCCTAAACCATGCAGACCCATTTCATTTTCATTTTGACAGTAGTGA<br>CCCAT <b>TAATTAAG</b> GCCTGAGGTTTTCCT                                                                                               |
| HRE3      | TGCCCAGTTTTGTTTGGCTGTATATTCATAGTGCCCAGTGCAGCAGT<br><b>AGGTGCT</b> CTTTACATATCTGCTGAATAAACCAATCTAGGTAGGGCTG<br>GCATTCTCA                                                                 |
| HRE3 mut  | TGCCCAGTTTTGTTTGGCTGTATATTCATAGTGCCCAGTGCAGCAGT<br><b>ATTAATA</b> CTTTACATATCTGCTGAATAAACCAATCTAGGTAGGGCTG<br>GCATTCTCA                                                                 |
| HRE4      | TGTGGCTGAGAAAATGCCCTTCCCTAGGGGAGAAAA <b>GCACGTTTT</b><br>CCTGCACAAGCCAGTCTATAATTCCAAAGCACTTTCCTCCGGGTGC<br>TAGTATGTGACTGAGATATGGTCGAATCTAAACCAAGTCACAAAATC<br>AGTGATATCCATTGTGCGGAGGTAT |
| HRE4 mut  | TGTGGCTGAGAAAATGCCCTTCCCTAGGGGAGAAAA <b>TAATTAATT</b><br>CCTGCACAAGCCAGTCTATAATTCCAAAGCACTTTCCTCCGGGTGC<br>TAGTATGTGACTGAGATATGGTCGAATCTAAACCAAGTCACAAAATC<br>AGTGATATCCATTGTGCGGAGGTAT |
