# Supplementary material
Source: PubMed Central journal article supplement (PMC10657471)
Supplement: 41418_2023_1228_MOESM9_ESM.pdf [file 41418_2023_1228_MOESM9_ESM.pdf]

Supplementary Data 8. Output of extreme limiting dilution analysis

### SW480(NC-shHIF1A)

| Counter | Dose    | Tested | Response | Group   |
|---------|---------|--------|----------|---------|
| 1       | 1000000 | 5      | 5        | NC      |
| 2       | 500000  | 5      | 5        | NC      |
| 3       | 100000  | 5      | 4        | NC      |
| 4       | 50000   | 5      | 0        | NC      |
| 5       | 1000000 | 5      | 5        | shHIF1A |
| 6       | 500000  | 5      | 4        | shHIF1A |
| 7       | 100000  | 5      | 0        | shHIF1A |
| 8       | 50000   | 5      | 0        | shHIF1A |

| Confidence intervals for 1/(stem cell frequency) |        |          |        |
|--------------------------------------------------|--------|----------|--------|
| Group                                            | Lower  | Estimate | Upper  |
| NC                                               | 271600 | 120375   | 53351  |
| shHIF1A                                          | 813593 | 399966   | 196625 |

| Overall test for differences in stem cell frequencies between any of the groups |    |         |
|---------------------------------------------------------------------------------|----|---------|
| Chisq                                                                           | DF | P.value |
| 4.29                                                                            | 1  | 0.0383  |

### SW480(NC-shUSP51)

| Counter | Dose    | Tested | Response | Group     |
|---------|---------|--------|----------|-----------|
| 1       | 1000000 | 5      | 5        | shControl |
| 2       | 500000  | 5      | 5        | shControl |
| 3       | 100000  | 5      | 3        | shControl |
| 4       | 50000   | 5      | 0        | shControl |
| 5       | 1000000 | 5      | 5        | shUSP51   |
| 6       | 500000  | 5      | 3        | shUSP51   |
| 7       | 100000  | 5      | 0        | shUSP51   |
| 8       | 50000   | 5      | 0        | shUSP51   |

| Confidence intervals for 1/(stem cell frequency) |         |          |        |
|--------------------------------------------------|---------|----------|--------|
| Group                                            | Lower   | Estimate | Upper  |
| shControl                                        | 344488  | 156396   | 71003  |
| shUSP51                                          | 1059330 | 514708   | 250087 |

| Overall test for differences in stem cell frequencies between any of the groups |    |         |
|---------------------------------------------------------------------------------|----|---------|
| Chisq                                                                           | DF | P.value |
| 4.4                                                                             | 1  | 0.0359  |

### HCT116(NC-USP51)

| Counter | Dose   | Tested | Response | Group         |
|---------|--------|--------|----------|---------------|
| 1       | 500000 | 5      | 5        | Lenti-Control |
| 2       | 100000 | 5      | 1        | Lenti-Control |
| 3       | 50000  | 5      | 0        | Lenti-Control |
| 4       | 10000  | 5      | 0        | Lenti-Control |
| 5       | 500000 | 5      | 5        | Lenti-USP51   |
| 6       | 100000 | 5      | 5        | Lenti-USP51   |
| 7       | 50000  | 5      | 1        | Lenti-USP51   |
| 8       | 10000  | 5      | 0        | Lenti-USP51   |

| Confidence intervals for 1/(stem cell frequency) |        |          |        |
|--------------------------------------------------|--------|----------|--------|
| Group                                            | Lower  | Estimate | Upper  |
| Lenti-USP51                                      | 168712 | 77686    | 35771  |
| Lenti-Control                                    | 617617 | 272406   | 120147 |

| Overall test for differences in stem cell frequencies between any of the groups |    |         |
|---------------------------------------------------------------------------------|----|---------|
| Chisq                                                                           | DF | P.value |
| 4.15                                                                            | 1  | 0.0417  |
