# Supplementary material
Source: PubMed Central journal article supplement (PMC10657471)
Supplement: 41418_2023_1228_MOESM13_ESM.pdf [file 41418_2023_1228_MOESM13_ESM.pdf]

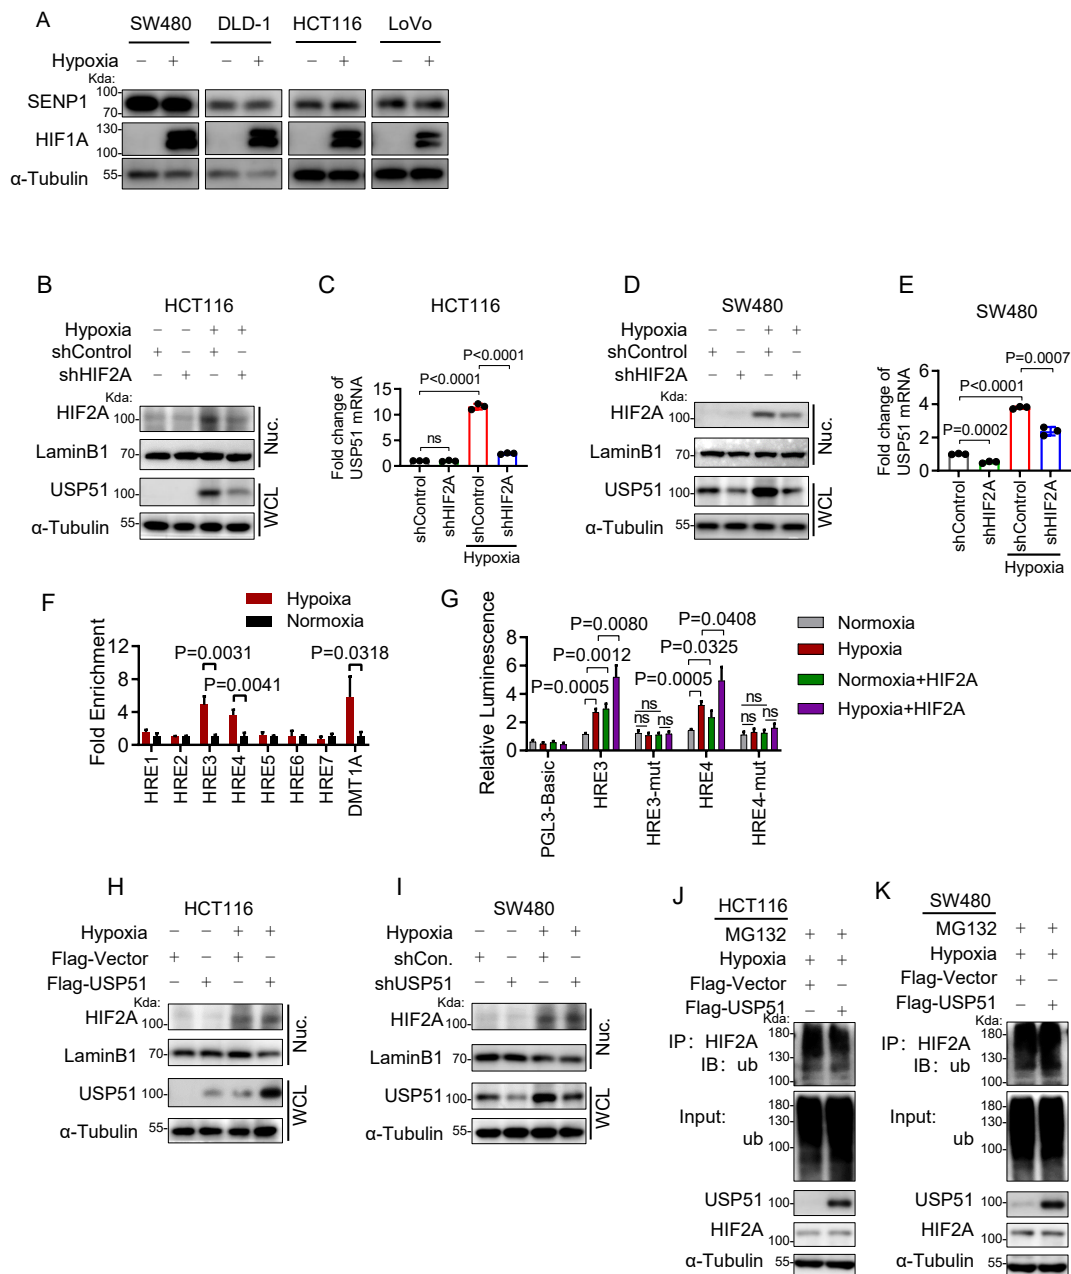

Supplementary Figure 4. **A** SW480, DLD-1, HCT116 and LoVo cells were exposed to normoxia or hypoxia. Cell lysates were prepared and blotted by anti-SEN1P1 and anti-HIF1A antibody. **B, C** HIF2A was knocked down in HCT116 cells under normoxia or hypoxia. The protein level (**B**) and relative mRNA level (**C**) of USP51 were measured. **D, E** HIF2A was knocked down in SW480 cells under normoxia or hypoxia. The protein level (**D**) and relative mRNA level (**E**) of USP51 were measured. **F** The CHIP assay was performed with anti-HIF2A antibody in SW480 cells. **G** The relative luciferase activity in cell lysates under the indicated conditions. **H, I** The protein level of HIF2A was assessed in HCT116 cells with USP51 overexpression (**H**) and in SW480 cells with USP51 knockdown (**I**), under either normoxia or hypoxia. **J, K** USP51 was overexpressed in both HCT116 (**J**) and SW480 cells (**K**). The ubiquitination levels of HIF2A were measured. Data are expressed as mean  $\pm$  SD, n=3 biological replicates. ns: not significant. WCL: Whole cell lysate. Nuc: nuclear fraction.
