# Supplementary material
Source: PubMed Central journal article supplement (PMC10657471)
Supplement: 41418_2023_1228_MOESM14_ESM.pdf [file 41418_2023_1228_MOESM14_ESM.pdf]

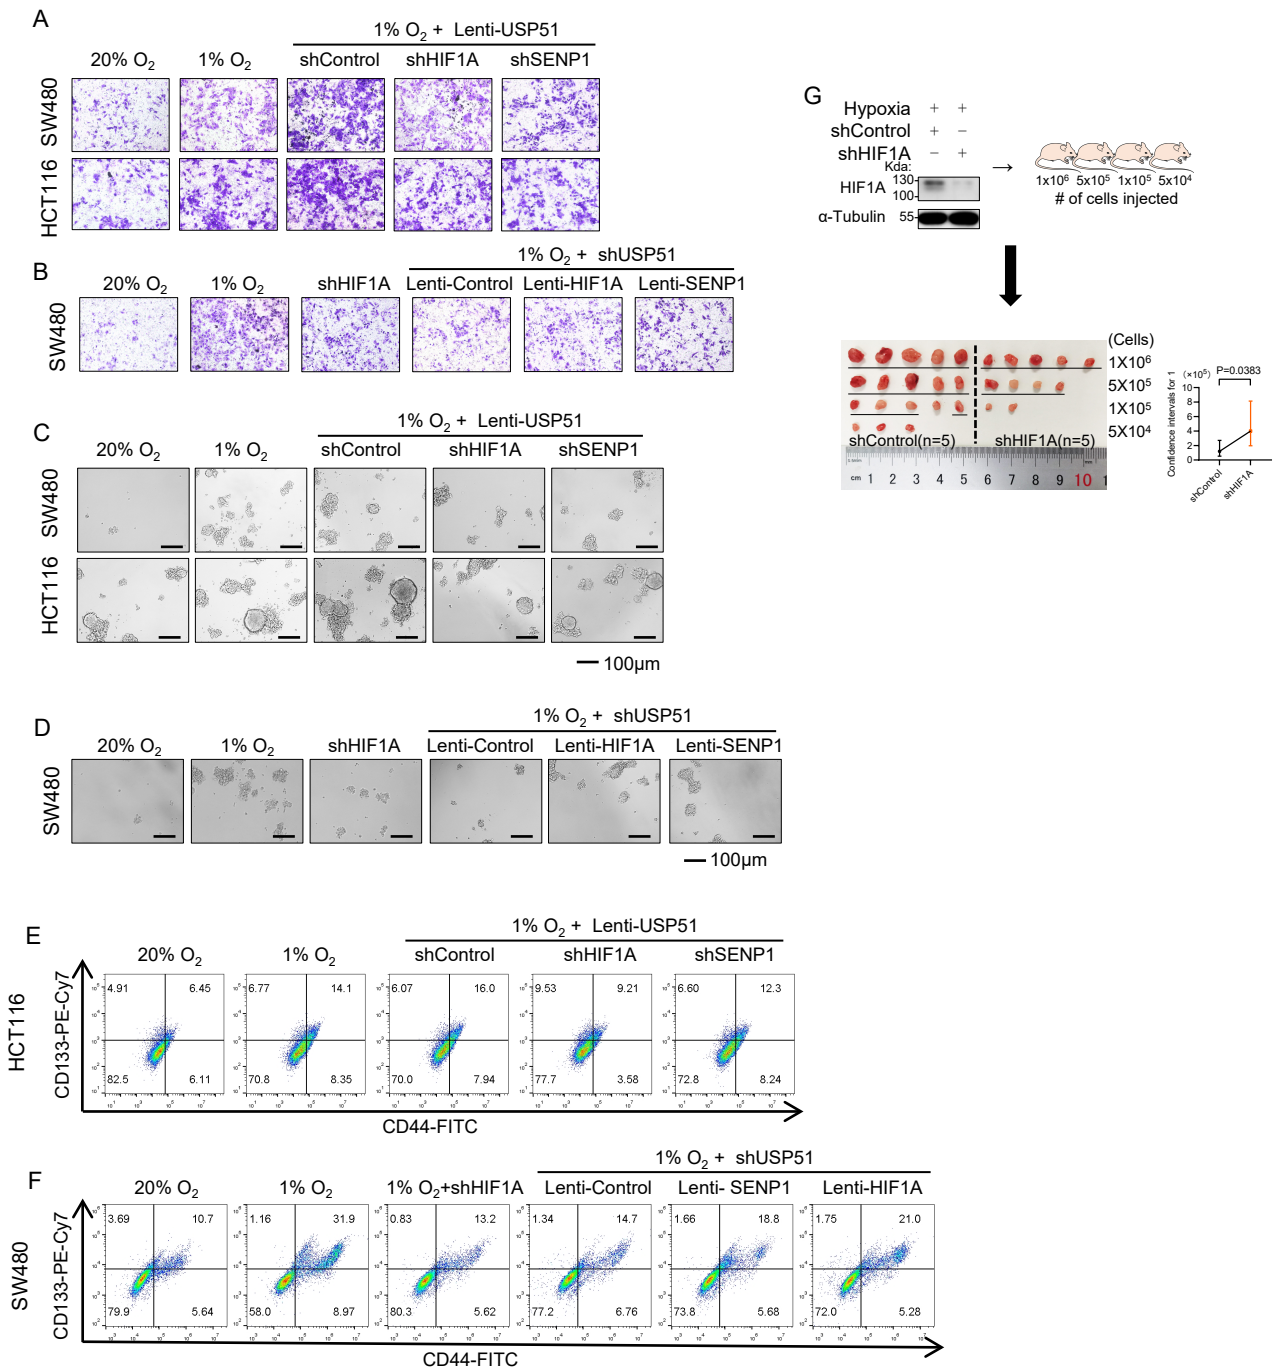

Supplementary Figure 5 (Related to Figure 5)

A The representative images of transwell assay in Figure 5E, F.

B The representative images of transwell assay in Figure 5G.

C The representative images of sphere formation assay in Figure 5H, I

D The representative images of sphere formation assay in Figure 5J

E The representative images of flow cytometry analysis in Figure 5K

F The representative images of flow cytometry analysis in Figure 5L

G HIF1A was stably knockdown in SW480 cells. A limiting dilution assay was performed. The positive responses were under lined.
