# Supplementary material
Source: PubMed Central journal article supplement (PMC10657471)

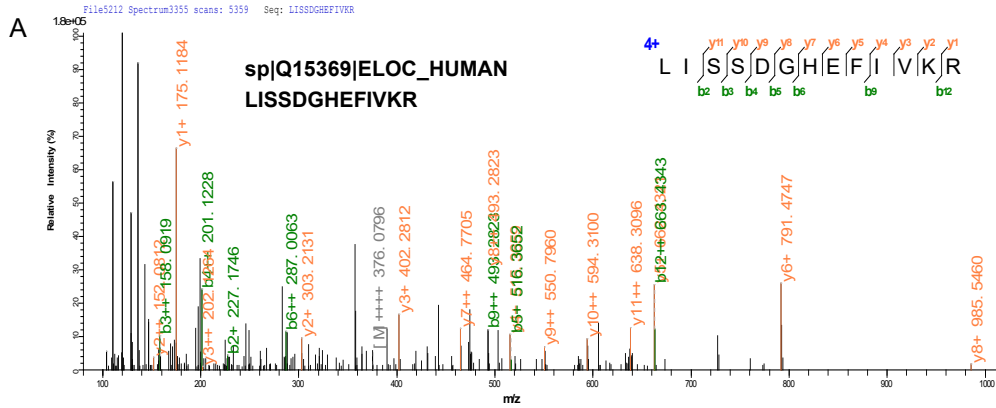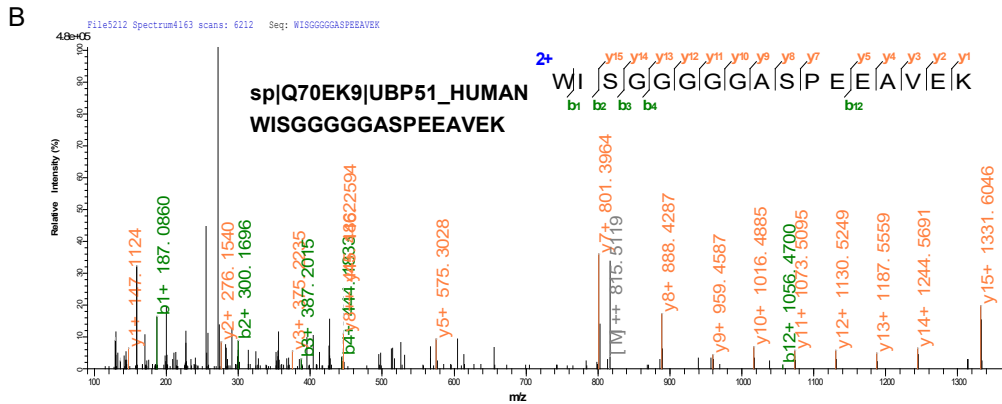

Supplementary Figure 2. Mass spectrum of a peptide from ELOC (A) and USP51 (B).

Supplement: 41418_2023_1228_MOESM11_ESM.pdf [file 41418_2023_1228_MOESM11_ESM.pdf]
